# Supplementary material
Source: PubMed Central journal article supplement (PMC3922400)

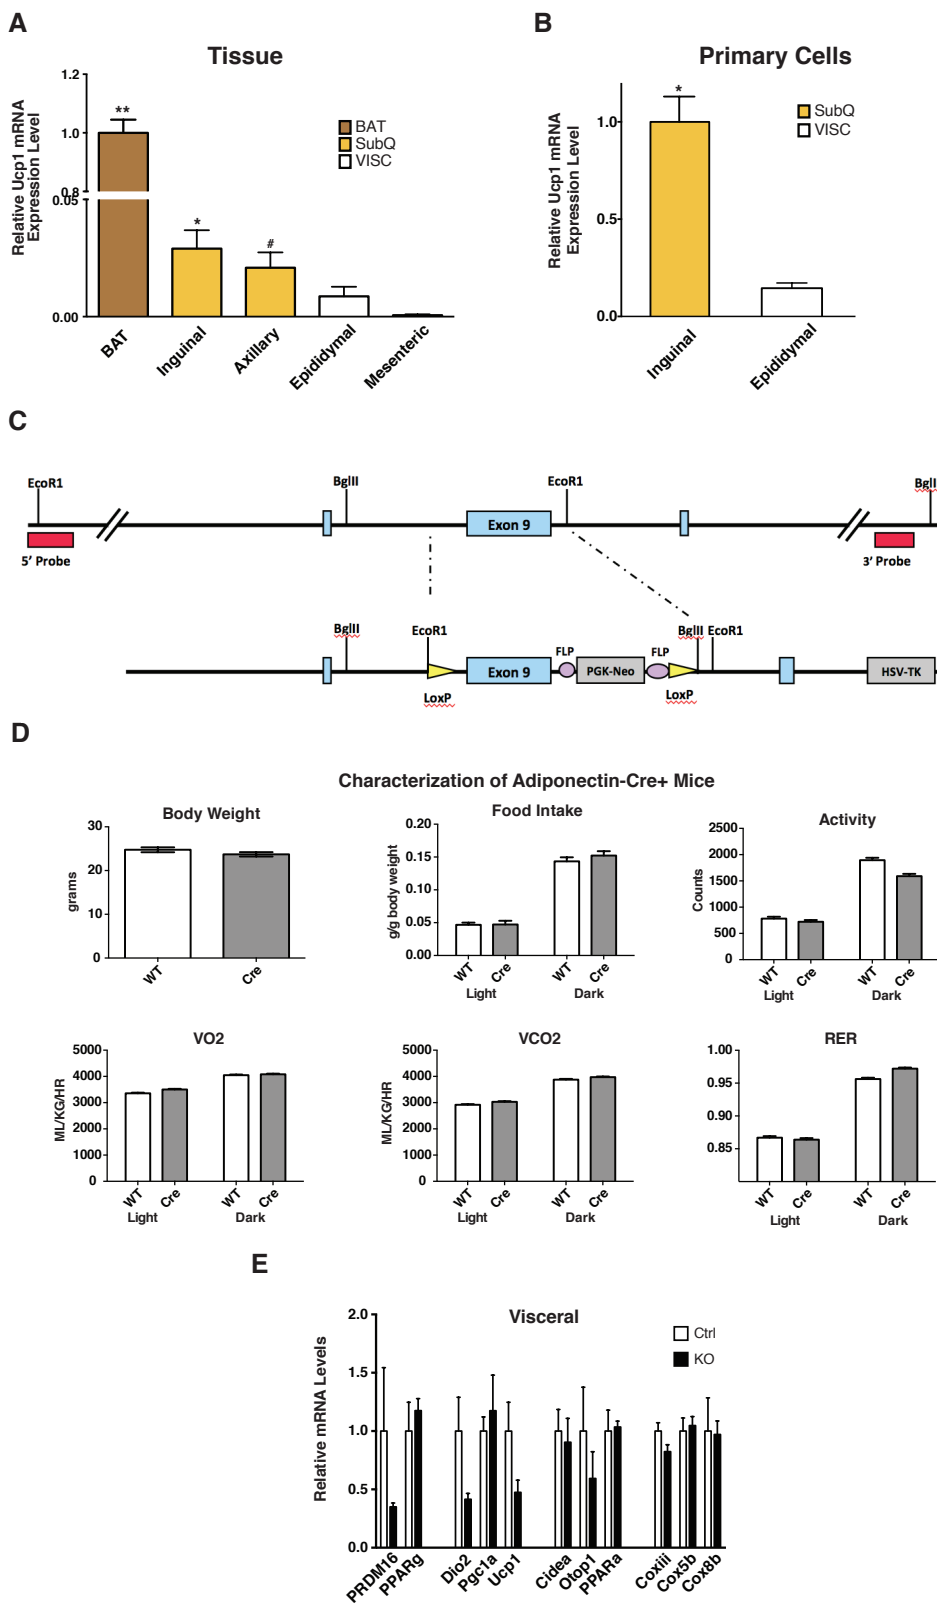

**A**

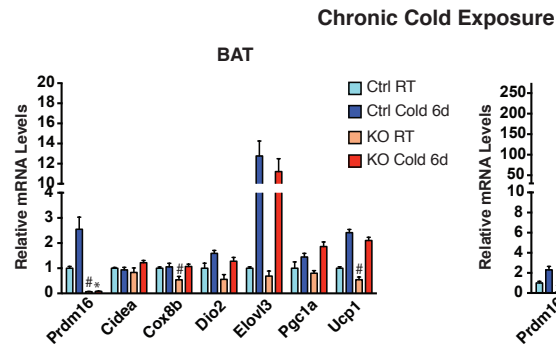

**B**

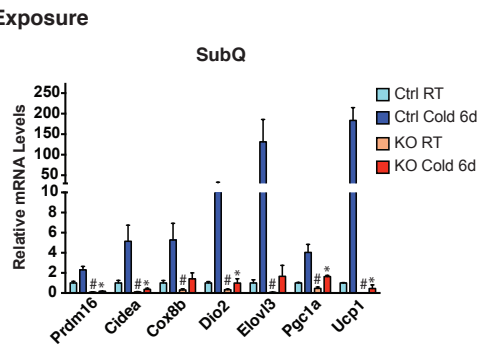

**C**

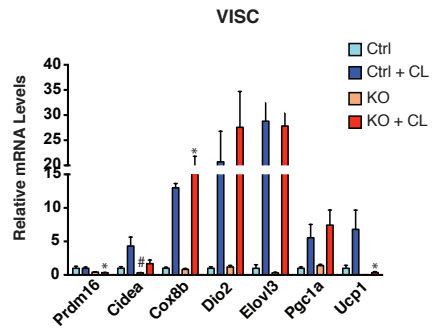

**D**

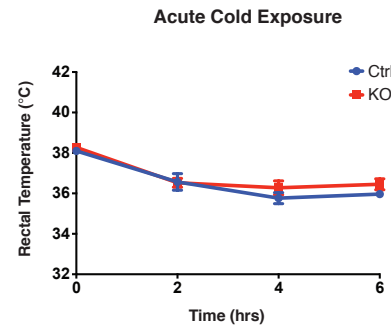

**E**

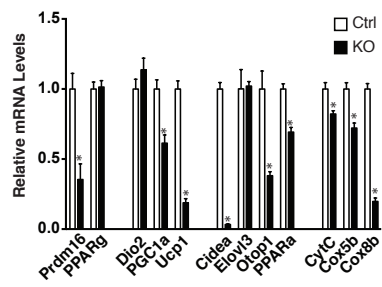

**F**

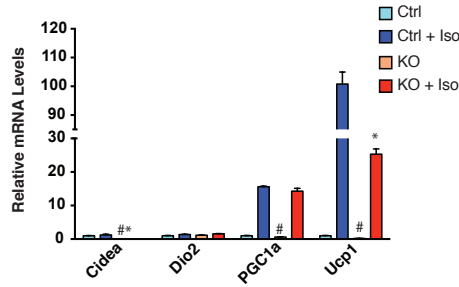

**G**

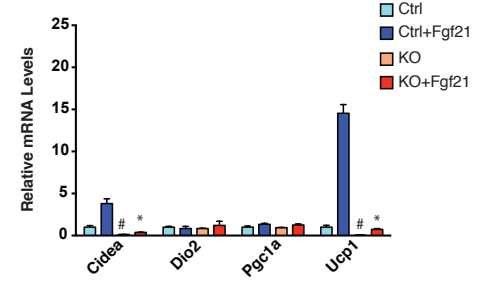

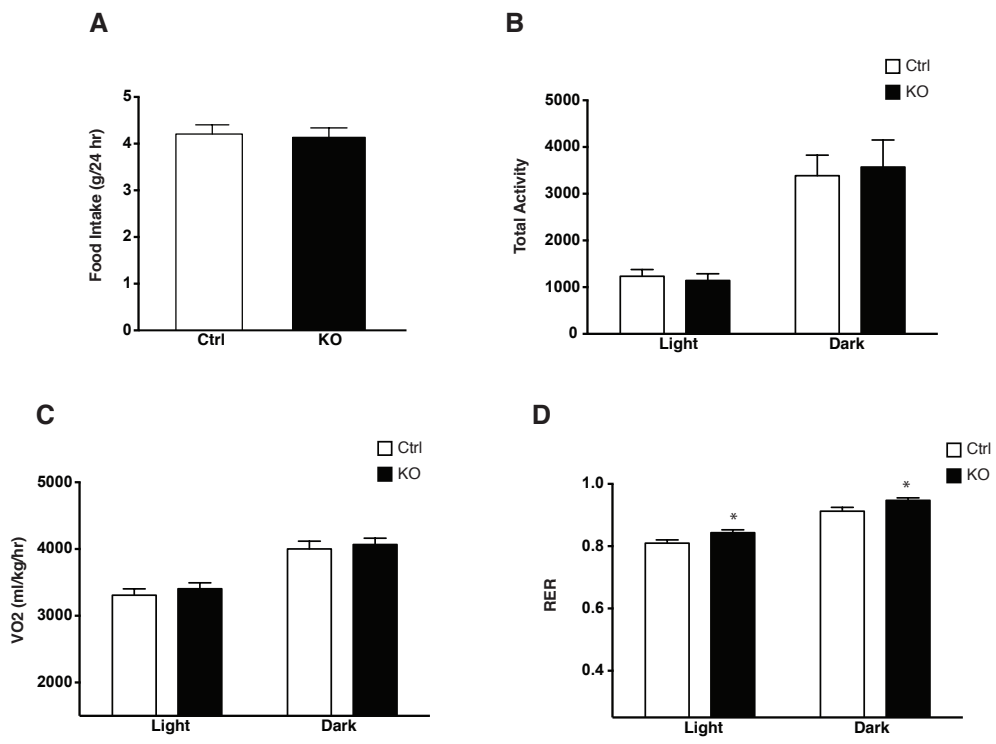

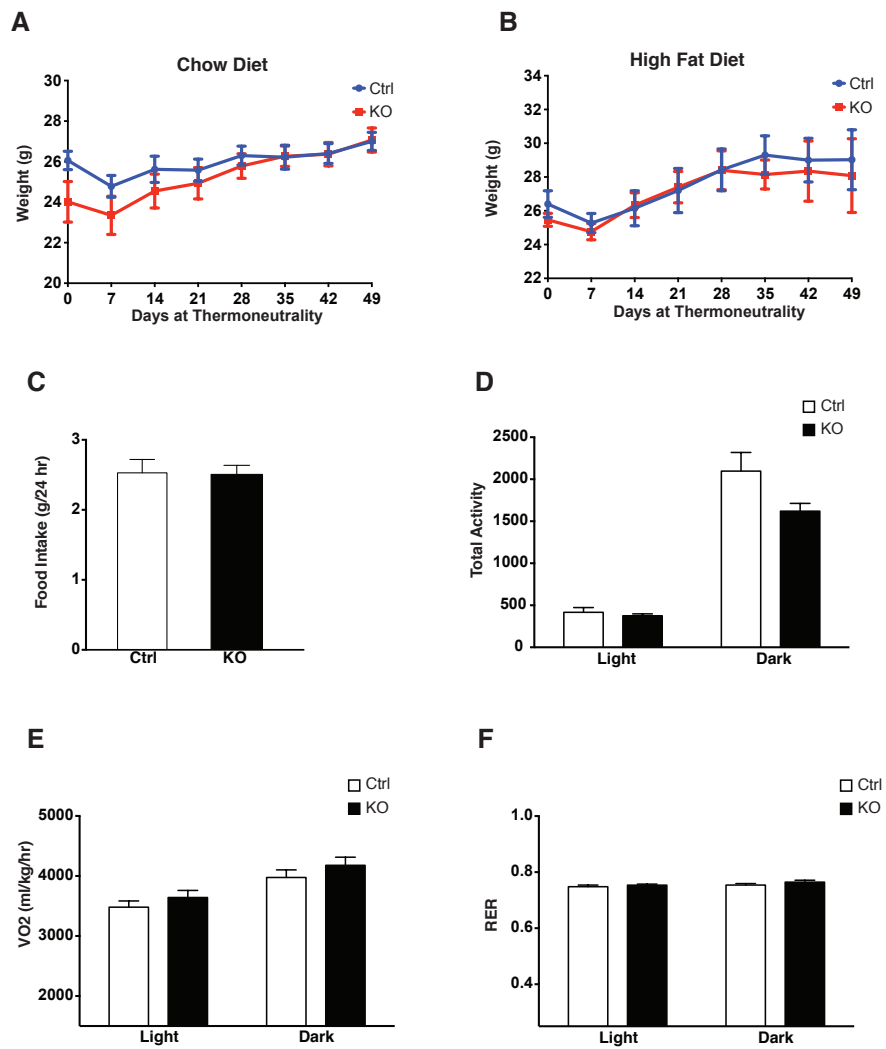



**A**

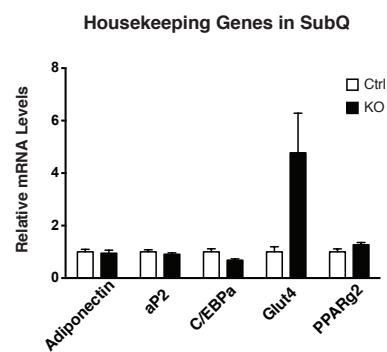

**B**

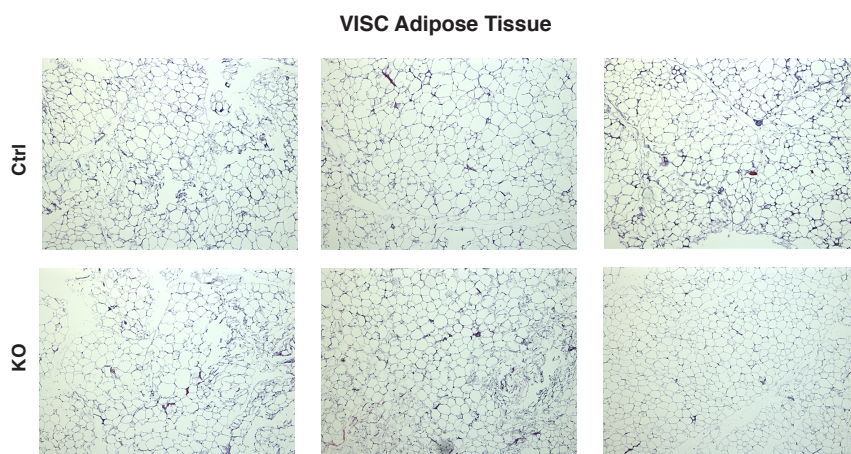

**C**

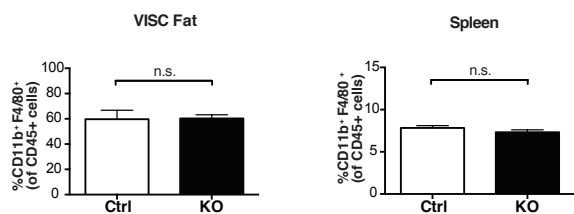

**D**

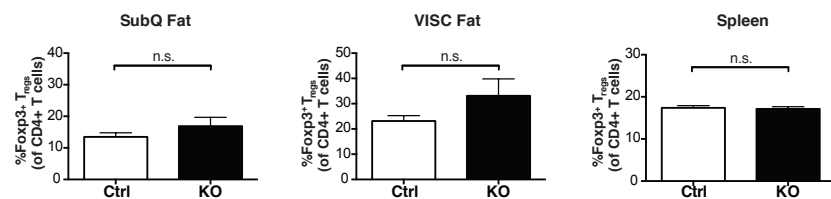

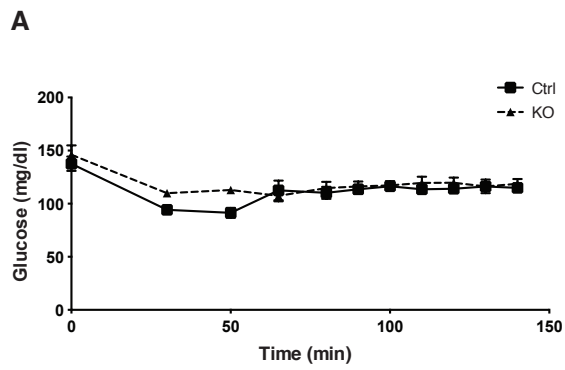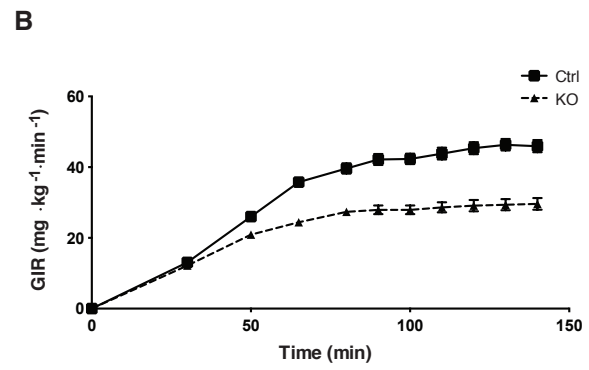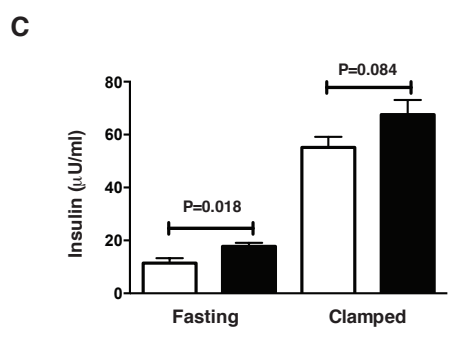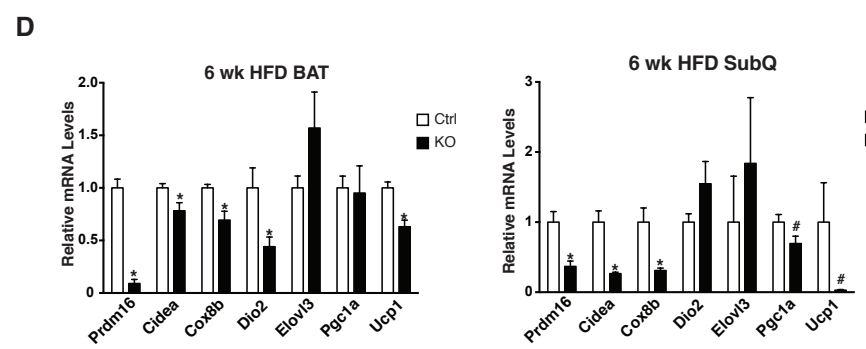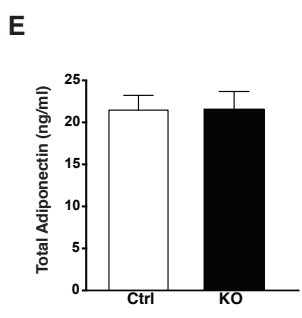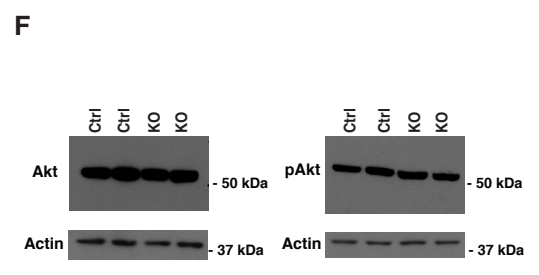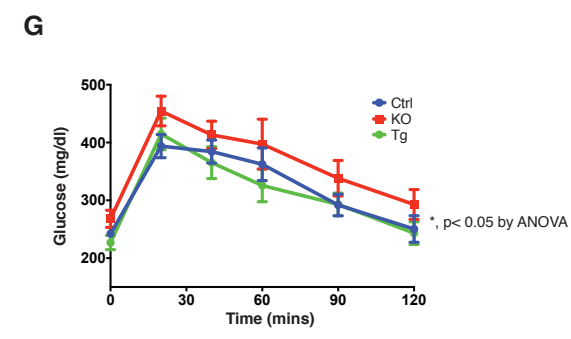

**A**

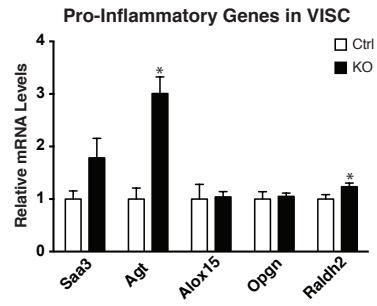

**B**

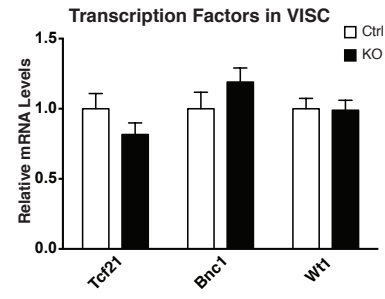

**C**

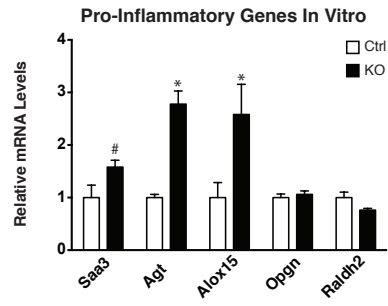

**D**

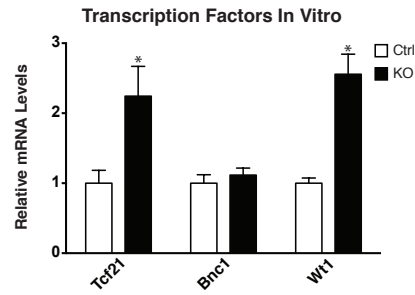

**E**

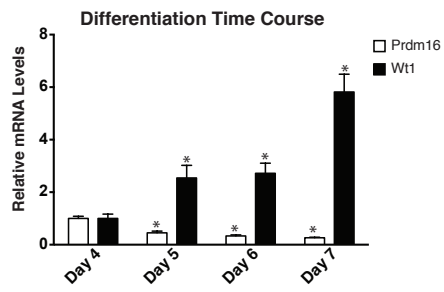

Supplement: NIHMS552456-supplement-02.pdf [file NIHMS552456-supplement-02.pdf]
